# Supplementary material
Source: PubMed Central journal article supplement (PMC1544051)
Supplement: pnas_0601793103_1.pdf [file pnas_0601793103_1.pdf]

A

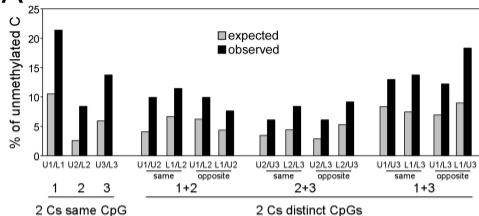

B

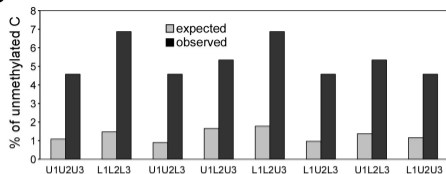

C

All data, including fully methylated

|    |      | p (2 tail) | Bonferroni |        |
|----|------|------------|------------|--------|
| 1  | U1L1 | <0.0001    | 0,00313    | p<0,05 |
| 2  | L1U3 | <0.0001    | 0,00333    | p<0,05 |
| 3  | U3L3 | <0.0001    | 0,00357    | p<0,05 |
| 4  | U2L2 | <0.0001    | 0,00385    | p<0,05 |
| 5  | U1U2 | 0,0001     | 0,00417    | p<0,05 |
| 6  | L1L3 | 0,0007     | 0,00455    | p<0,05 |
| 7  | U1L3 | 0,0044     | 0,00500    | p<0,05 |
| 8  | L1L2 | 0,0088     | 0,00556    |        |
| 9  | L2L3 | 0,0164     | 0,00625    |        |
| 10 | U1U3 | 0,0201     | 0,00714    |        |
| 11 | U2L3 | 0,0266     | 0,00833    |        |
| 12 | L2U3 | 0,0285     | 0,01000    |        |
| 13 | U1L2 | 0,0375     | 0,01250    |        |
| 14 | L1U2 | 0,0412     | 0,01667    |        |
| 15 | U2U3 | 0,0908     | 0,02500    |        |
| 16 | U4L4 | 0,7550     | 0,05000    |        |

D

At least two demethylation events

|    |      | p (2 tail) | Bonferroni |
|----|------|------------|------------|
| 1  | U2L2 | 0,0289     | 0,00313    |
| 2  | U3L3 | 0,0293     | 0,00333    |
| 3  | U1U3 | 0,0964     | 0,00357    |
| 4  | L1U2 | 0,1287     | 0,00385    |
| 5  | U1L1 | 0,1811     | 0,00417    |
| 6  | U2U3 | 0,3882     | 0,00455    |
| 7  | U1U2 | 0,3920     | 0,00500    |
| 8  | L2L3 | 0,4904     | 0,00556    |
| 9  | U1L3 | 0,7896     | 0,00625    |
| 10 | L1L2 | 0,8626     | 0,00714    |
| 11 | L1U3 | 0,8626     | 0,00833    |
| 12 | L1L3 | 0,8775     | 0,01000    |
| 13 | U1L2 | 0,8866     | 0,01250    |
| 14 | L2U3 | 0,9883     | 0,01667    |
| 15 | U4L4 | 1,0000     | 0,02500    |
| 16 | U2L3 | 1,0000     | 0,05000    |
