# Supplementary material
Source: PubMed Central journal article supplement (PMC1544051)
Supplement: pnas_0601793103_2.pdf [file pnas_0601793103_2.pdf]

Total cellular DNA cleaved  
*in vivo* or *in vitro*:

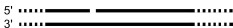

DNA  
Denaturation

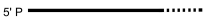

Primer  
Extension

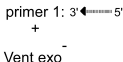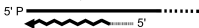

Linker  
Ligation

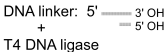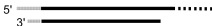

Amplification

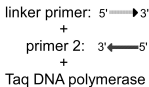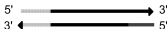

Labeling

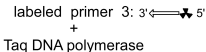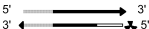

Sequencing gel
